# Supplementary material for: Is There an Influence of Electrically Stimulated Osteoblasts on the Induction of Osteoclastogenesis?
Source: MDPI journal article supplement (doi:10.3390/app122211840), 2022-11-21
Supplement: s1 [file s1]

# Supplementary Materials:

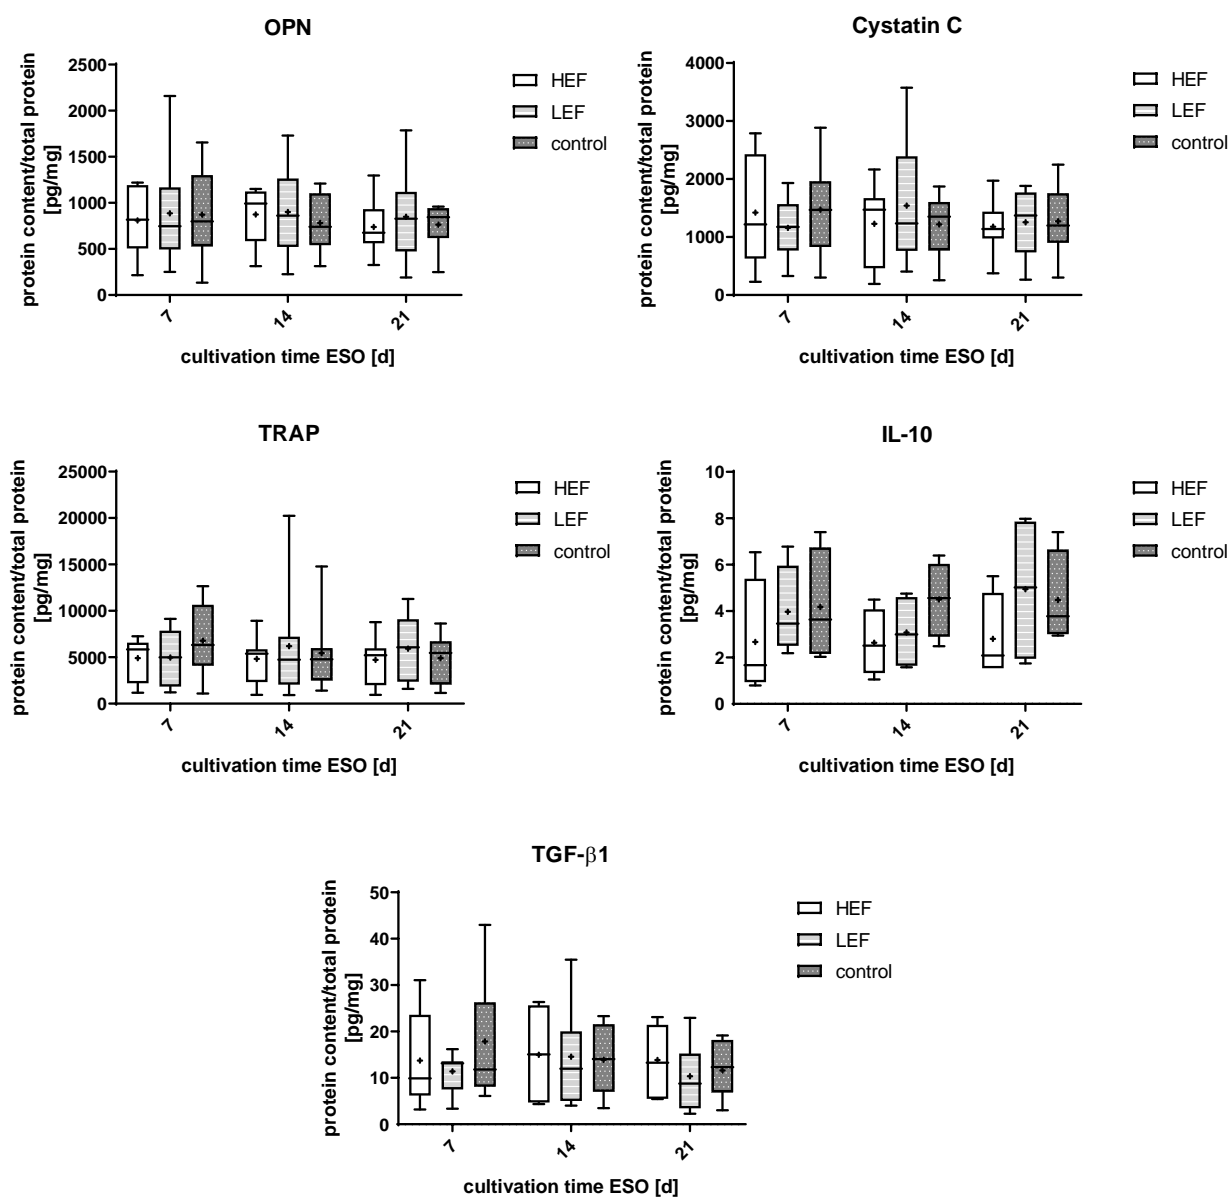

**Figure S1.** Released cytokines of PBMCs after 48 h incubation with pooled supernatant of osteoblast stimulated (ESO) over 7, 14 and 21 d, and without electric stimulation (NSO). The protein concentration was related to the total protein concentration of the supernatant of each sample. Afterwards, the respective protein concentration from the pooled osteoblast medium was subtracted. Boxplots were used to present the distribution of the total results [ $n \geq 5$ ]

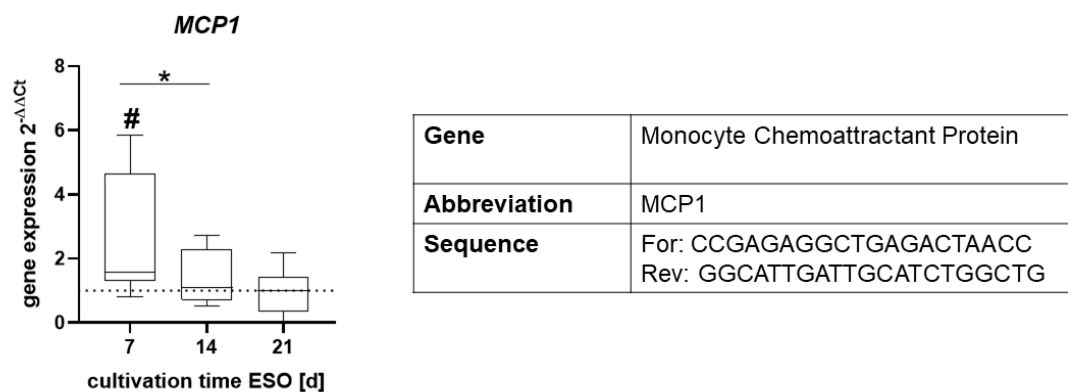

**Figure S2.** MCP1 expression of pre-osteoclasts after 48 h incubation with pooled supernatant of osteoblast (ESO) stimulated over 7, 14, and 21 d and without electric stimulation (NSO). Gene expression data was related to the NSO using the  $2^{-\Delta\Delta C_t}$  method. Boxplots were used to present the distribution of the total results with significant changes [ $n = 8$ ]. Significant differences were determined using the two-way ANOVA with Tukey. # indicates significant differences between the ESO and NSO: #  $p < 0.05$ , \* indicates significant differences between stimulation time points: \*  $p < 0.05$ .

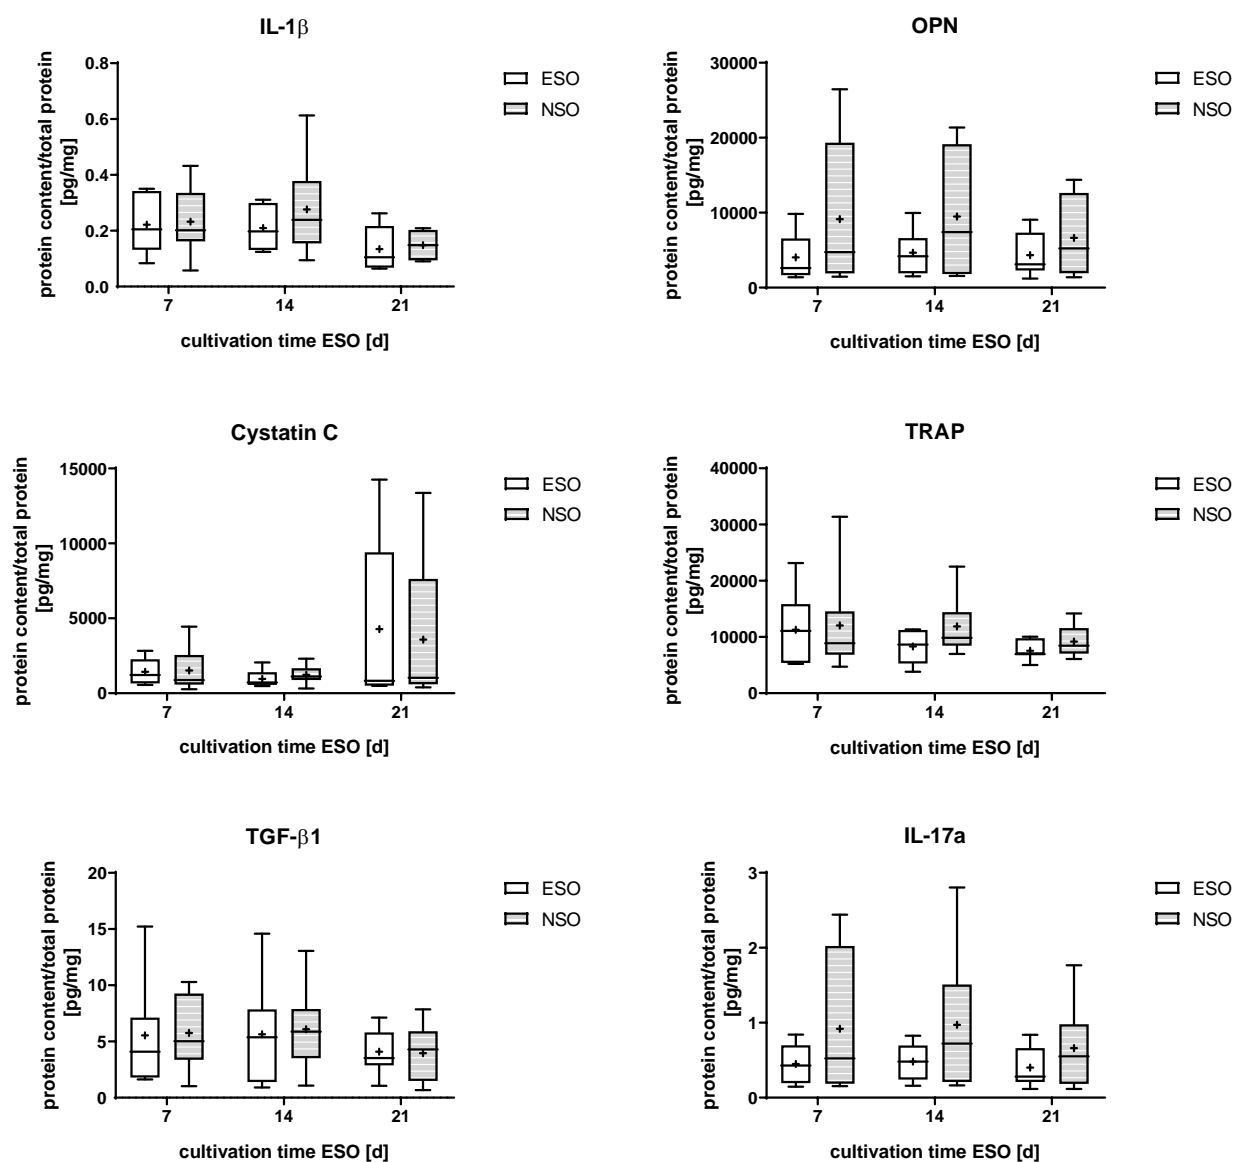

**Figure S3.** Released cytokines of pre-osteoclasts after 48 h incubation with pooled supernatant of osteoblast stimulated (ESO) over 7, 14 and 21 d and without electric stimulation (NSO). The protein concentration was related to the total protein concentration of the supernatant of each sample. Afterwards, the respective protein concentration from the pooled osteoblast medium was subtracted. Boxplots were used to present the distribution of the total results [ $n \geq 6$ ]
